# Supplementary material
Source: PubMed Central journal article supplement (PMC3817466)

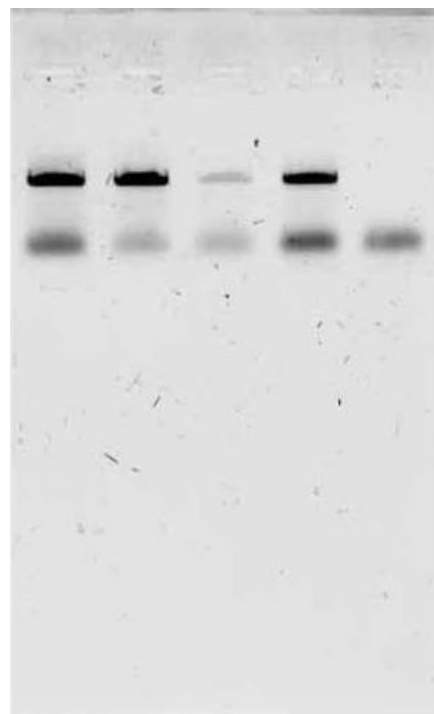

PIN1 Region +1

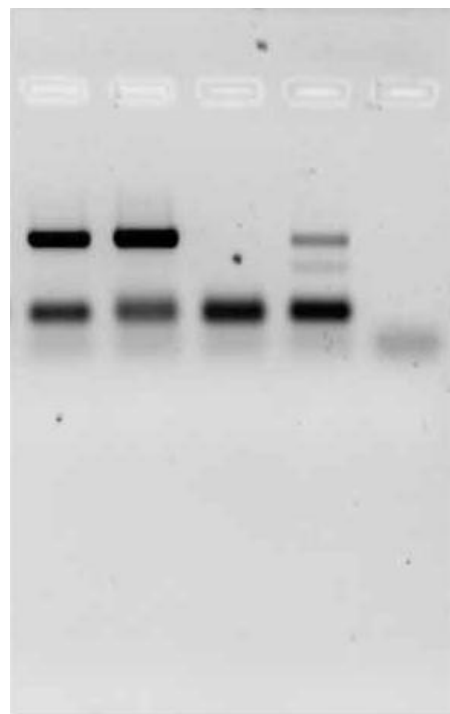

PIN1 Region +3

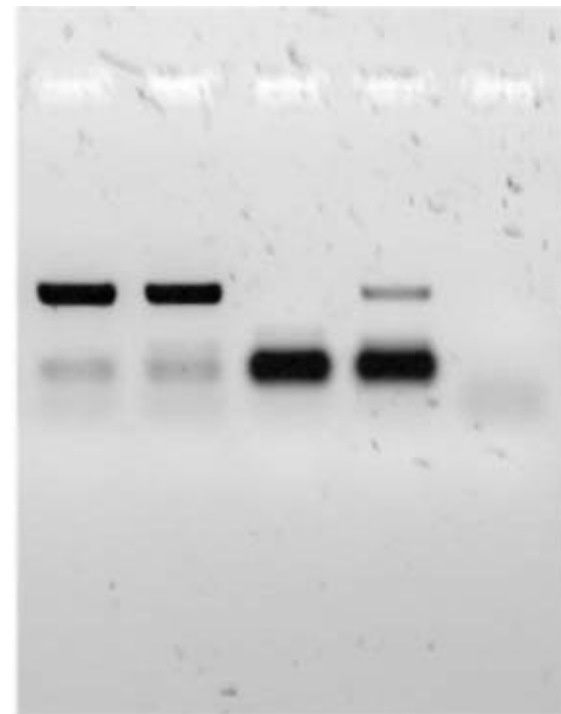

PIN4 Region +1

Figure 5A

Supplement: emboj2013216df5a.pdf [file emboj2013216df5a.pdf]
